# Supplementary material for: Expansion and differentiation of human hepatocyte-derived liver progenitor-like cells and their use for the study of hepatotropic pathogens
Source: PubMed Central journal article supplement (PMC6318298; doi:10.1038/s41422-018-0103-x), 2018-10-25
Supplement: 41422_2018_103_MOESM2_ESM.pdf [file 41422_2018_103_MOESM2_ESM.pdf]

Fig. S2

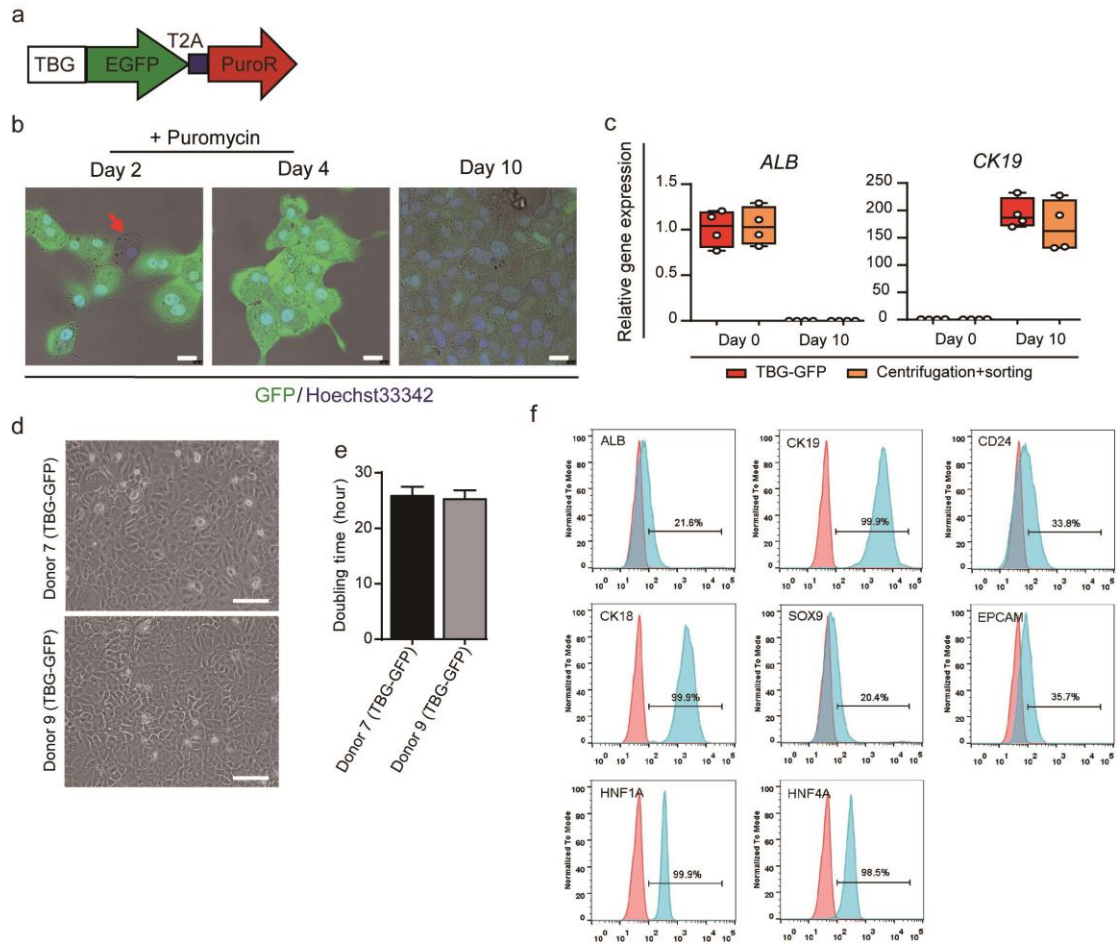

**Supplementary information, fig. S2 Lineage Tracing of PHCs, related to Fig. 1.** (a) Schematic representation of the TBG-EGFP-T2A-puro lentivirus vectors. (b) Primary liver cells were plated on a Matrigel-coated culture dish in hepatocyte maintenance medium (Lonza) overnight. Then, the cells were infected with a lentivirus carrying TBG-EGFP-T2A-puro for 24 hours and treated with puromycin for 2 days. Cells were then cultured in TEM for another 6 days. Red arrow indicates uninfected cell. Scale bars, 20  $\mu\text{m}$ . (c) QPCR analyses for the expression of the indicated genes during TEM culture at day 0 and day 10, n = 4 technical replicates. (d) Light microscopy images of TBG-GFP labeled HepLPCs derived from 2 donors in TEM at passage 10. Scale bars, 100 $\mu\text{m}$ . (e) Doubling time calculated for 2 donors. Error bars represent s.d.; n = 3 technical replicates. (f) Flow cytometric analysis showing the proportion of ALB, CK18, HNF1A, CK19, SOX9, HNF4A, CD24 and EpCAM positive cells in TBG-GFP labeled liver cells (passage 5). Blue, positive cells; red, negative controls.
