# Supplementary material for: Expansion and differentiation of human hepatocyte-derived liver progenitor-like cells and their use for the study of hepatotropic pathogens
Source: PubMed Central journal article supplement (PMC6318298; doi:10.1038/s41422-018-0103-x), 2018-10-25
Supplement: 41422_2018_103_MOESM5_ESM.pdf [file 41422_2018_103_MOESM5_ESM.pdf]

Fig. S5

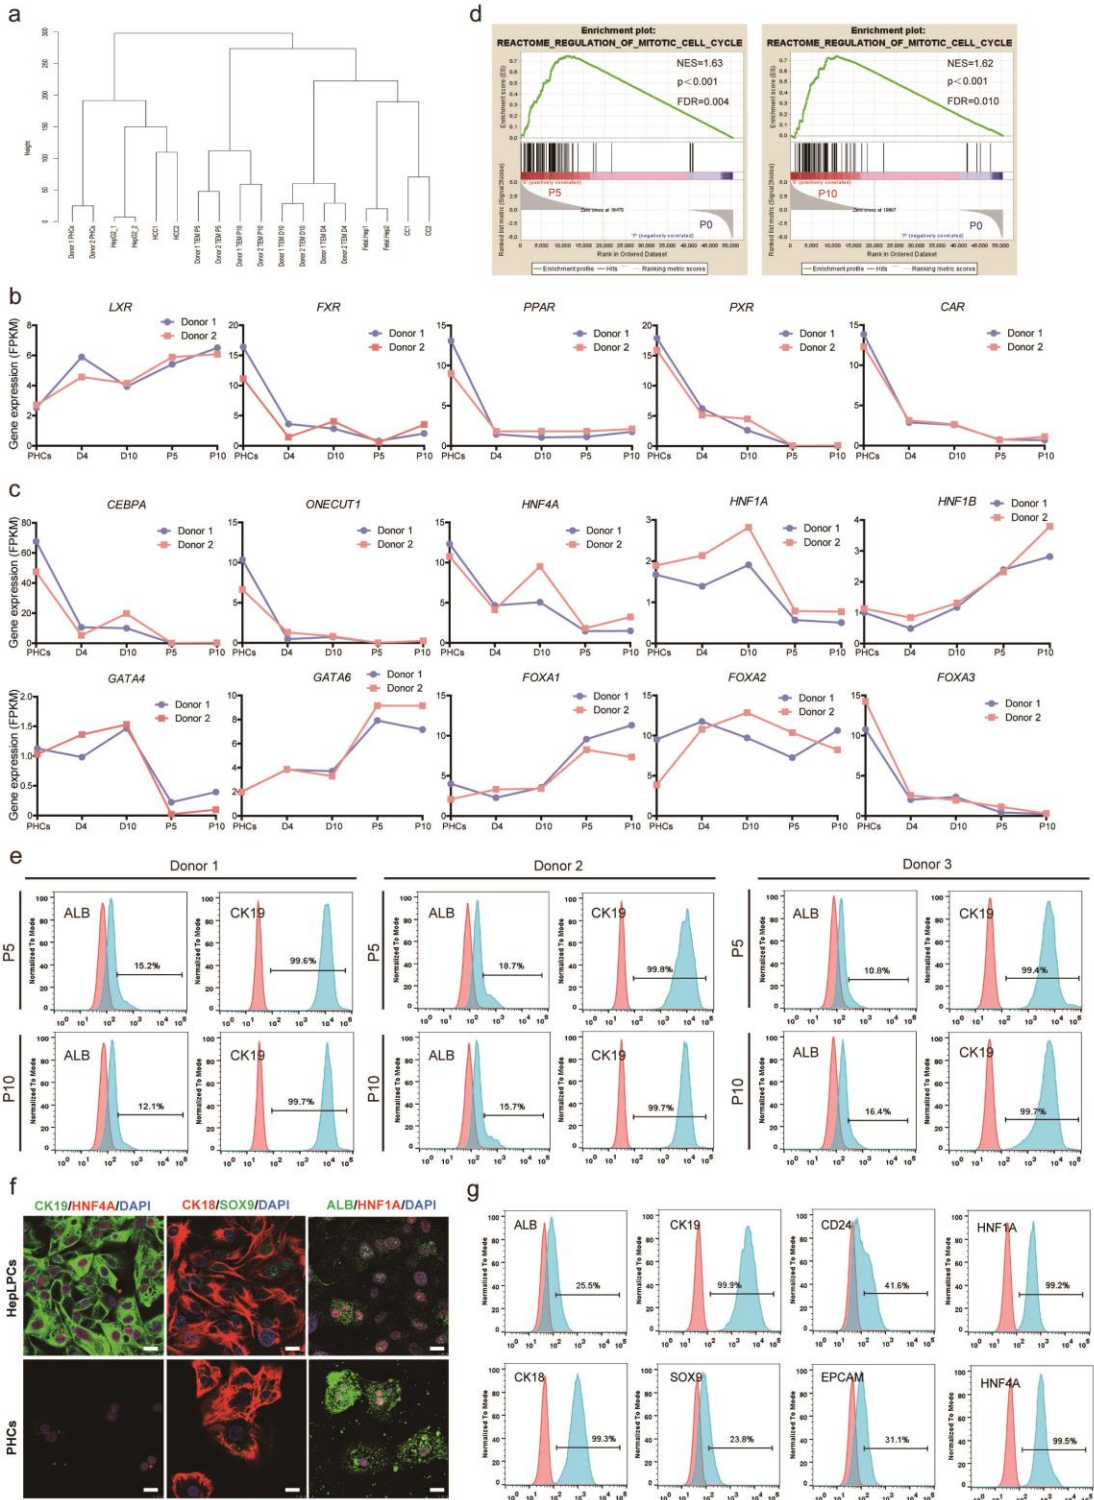

**Supplementary information, fig. S5 Expression changes of hepatic markers during hepatocyte-to-LPC conversion and expansion, related to Fig. 3.** (a) Hierarchical clustering based on global gene expression profile. (b) Gene expression of hepatic nuclear receptor family and transcription factor family (c) in PHCs and samples at day 4, day 10, passage 5 and passage 10 in TEM from 2 donors. (d) Gene Set Enrichment Analysis (GSEA) was performed to assess cell proliferation capacity by comparing passage 5 or passage 10 samples with PHCs. (e) Flow cytometric analysis showing the proportion of ALB or CK19 positive cells of HepLPCs at passage 5 and passage 10 derived from 3 individual donors. Blue, positive cells; red, negative controls. (f) Immunofluorescence images for the expression of representative markers in HepLPCs and PHCs (collected overnight after seeding as a monolayer). Scale bars, 20 $\mu$ m. (g) Flow cytometric analysis showing the proportion of ALB, CK18, HNF1A, CK19, SOX9, HNF4A, CD24 and EpCAM positive cells (passage 5) in the populations from donor 4. Blue, positive cells; red, negative controls.
