# Supplementary material for: Expansion and differentiation of human hepatocyte-derived liver progenitor-like cells and their use for the study of hepatotropic pathogens
Source: PubMed Central journal article supplement (PMC6318298; doi:10.1038/s41422-018-0103-x), 2018-10-25
Supplement: 41422_2018_103_MOESM6_ESM.pdf [file 41422_2018_103_MOESM6_ESM.pdf]

Fig. S6

a

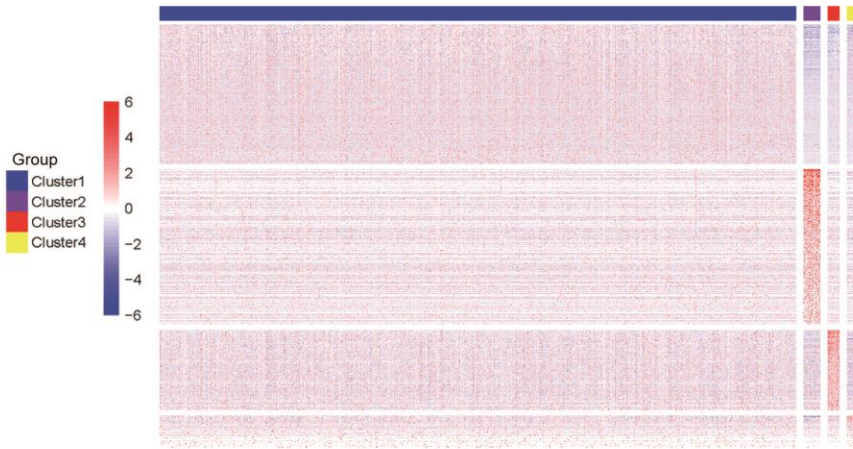

b

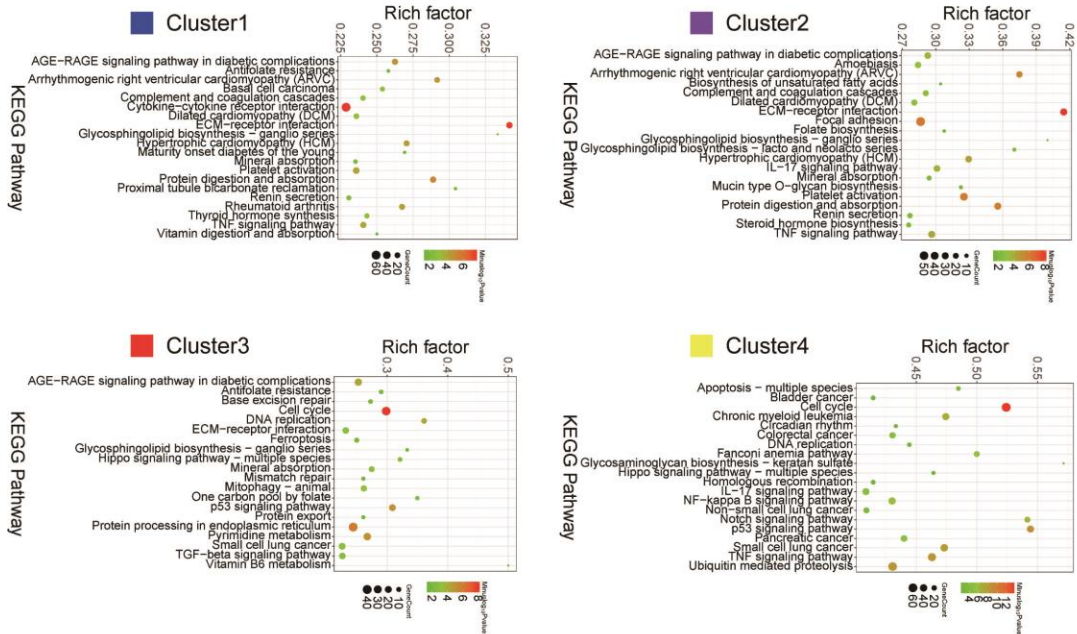

**Supplementary information, fig. S6 Subgroup specific genes heatmap (a) and KEGG pathway enrichment analysis of corresponding gene groups (b), related to fig. 3.**
