# Supplementary material for: Expansion and differentiation of human hepatocyte-derived liver progenitor-like cells and their use for the study of hepatotropic pathogens
Source: PubMed Central journal article supplement (PMC6318298; doi:10.1038/s41422-018-0103-x), 2018-10-25
Supplement: 41422_2018_103_MOESM7_ESM.pdf [file 41422_2018_103_MOESM7_ESM.pdf]

Fig. S7

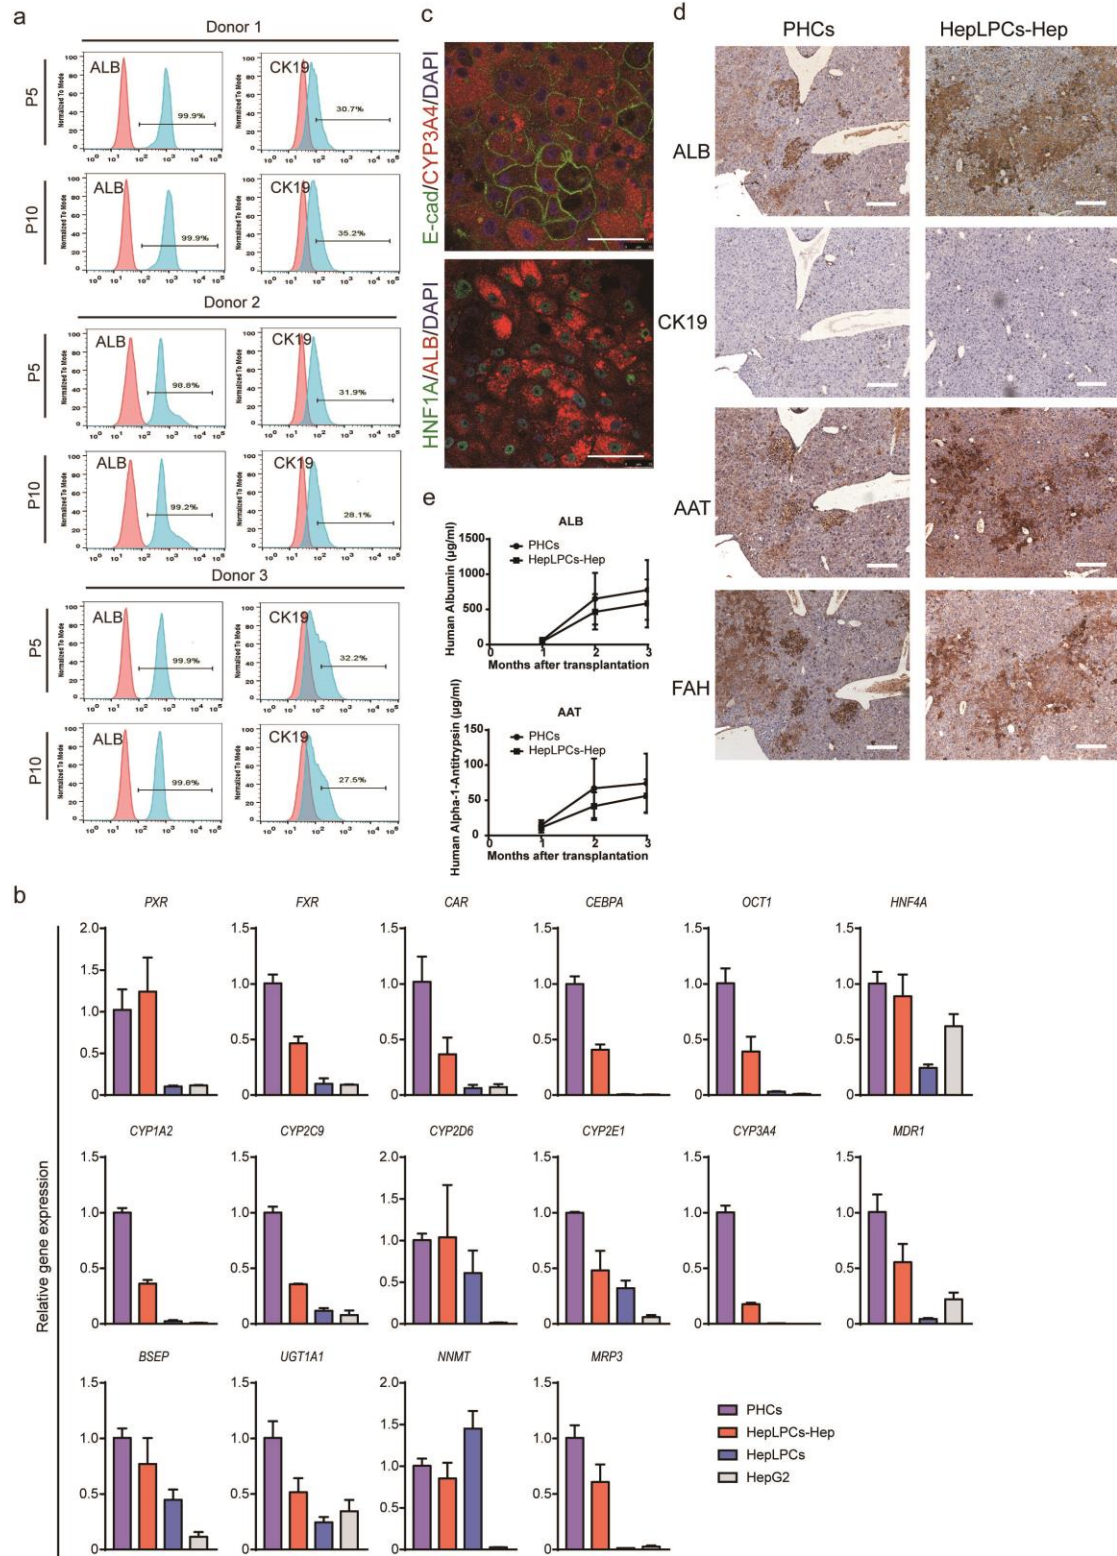

**Supplementary information, fig. S7 Expression changes of hepatic markers during hepatic differentiation of HepLPCs, related to fig. 4.** (a) Flow cytometric analysis showing the proportion of ALB or CK19 positive cells in HepLPCs-Hep differentiated from HepLPCs at passage 5 or 10 from 3 individual donors. Blue, positive cells; red, negative controls. (b) QPCR analyses for the expression of liver function related genes in PHCs (freshly isolated), HepLPCs-Hep, HepLPCs and HepG2. Error bars represent s.d.; n = 3 donors. (c) Immunofluorescence images of E-cadherin, CYP3A4, HNF1A and ALB in HepLPCs-Hep. Scale bars, 50 $\mu$ m. (d) Immunohistochemical staining of human ALB, CK19, AAT and FAH. Scale bars, 100 $\mu$ m. (e) Serum levels of human serum albumin and alpha-1-antitrypsin in mice transplanted with HepLPCs.
