# Supplementary material for: Expansion and differentiation of human hepatocyte-derived liver progenitor-like cells and their use for the study of hepatotropic pathogens
Source: PubMed Central journal article supplement (PMC6318298; doi:10.1038/s41422-018-0103-x), 2018-10-25
Supplement: 41422_2018_103_MOESM8_ESM.pdf [file 41422_2018_103_MOESM8_ESM.pdf]

Fig. S8

a

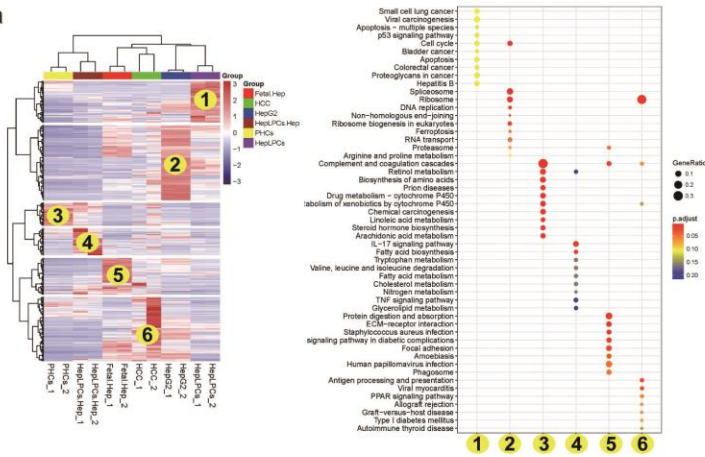

b

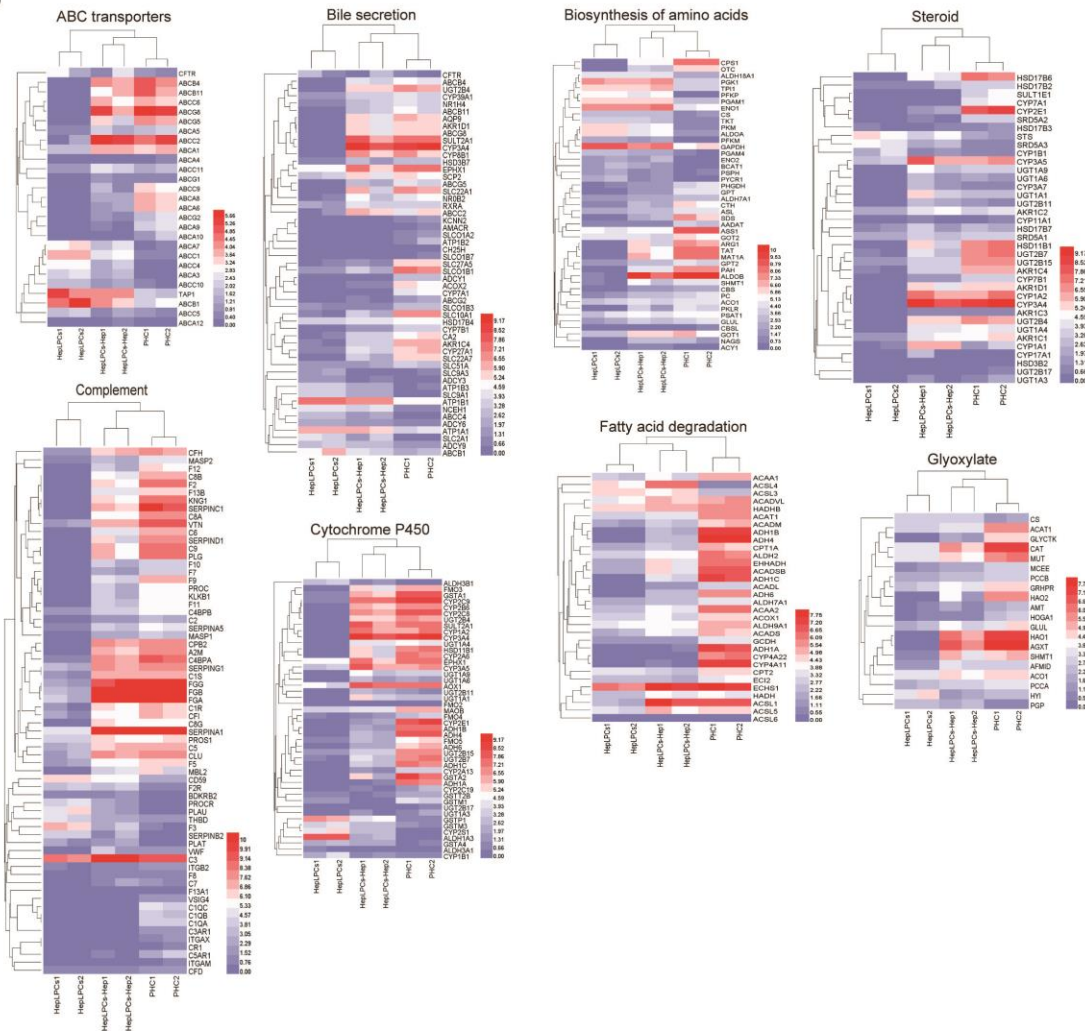

**Supplementary information, fig. S8 Heat maps for the expression of hepatic function-related genes, related to fig. 4.** (a) Differential gene groups in euclidean hierarchical clustering (left) and KEGG pathway enrichment analysis of the corresponding region (right). (b) Euclidean hierarchical clustering for the expression of hepatic function-related genes by HepLPCs, HepLPCs-Hep and PHCs. Each element represents the  $\log_2$  (normalized expression), as scaled by the corresponding color legends from 2 donors.
