# Supplementary material for: Expansion and differentiation of human hepatocyte-derived liver progenitor-like cells and their use for the study of hepatotropic pathogens
Source: PubMed Central journal article supplement (PMC6318298; doi:10.1038/s41422-018-0103-x), 2018-10-25
Supplement: 41422_2018_103_MOESM9_ESM.pdf [file 41422_2018_103_MOESM9_ESM.pdf]

Fig. S9

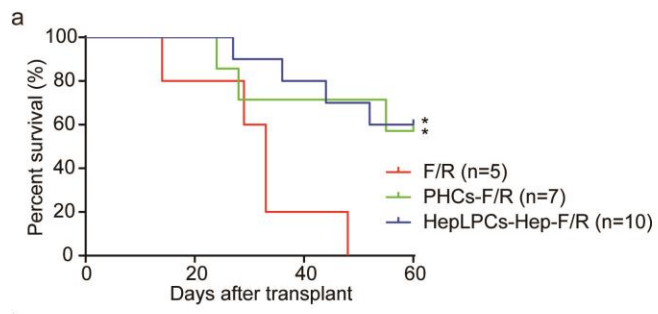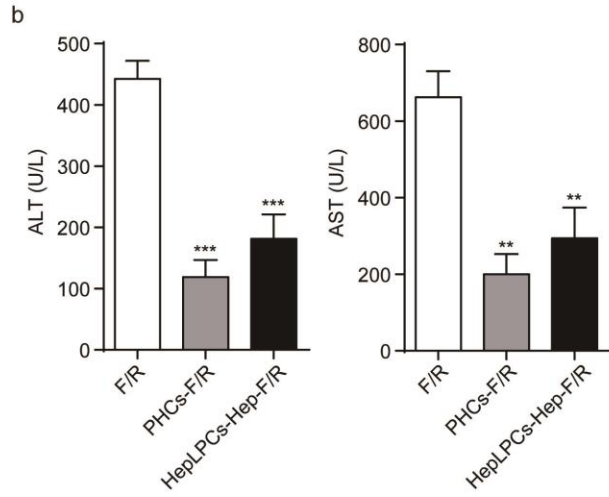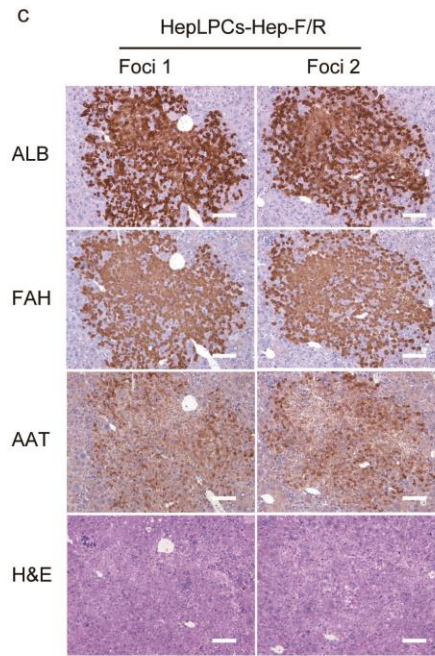

**Supplementary information, fig. S9 Survival studies, related to fig. 4.** (a) Kaplan-Meier survival curve of F/R mice that received no cells, PHCs or HepLPCs-Hep after NTBC withdrawal. (b) Serum levels of ALT and AST in moribund control F/R mice (n = 4), surviving PHCs-F/R mice (n = 4), and surviving HepLPCs-Hep-F/R mice (n = 6). (c) The integration of HepLPCs-Hep cells in F/R livers was determined by H&E and immunostaining for human ALB, FAH and AAT in serial sections. Scale bars, 100 $\mu$ m.
