# Supplementary material for: Expansion and differentiation of human hepatocyte-derived liver progenitor-like cells and their use for the study of hepatotropic pathogens
Source: PubMed Central journal article supplement (PMC6318298; doi:10.1038/s41422-018-0103-x), 2018-10-25
Supplement: 41422_2018_103_MOESM11_ESM.pdf [file 41422_2018_103_MOESM11_ESM.pdf]

Fig. S11

a

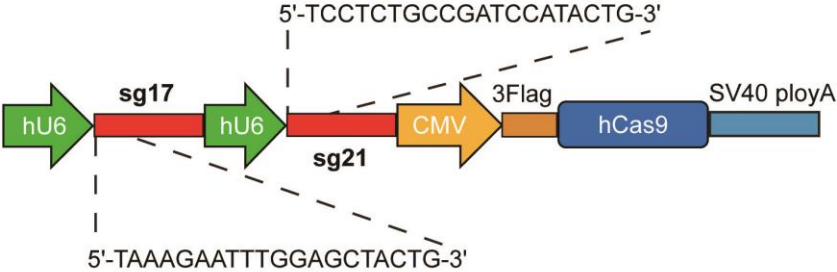

b

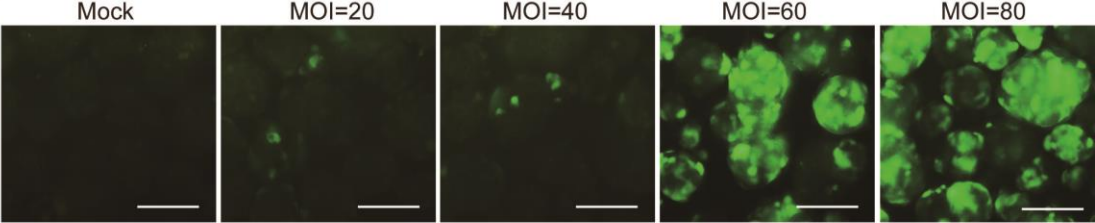

c

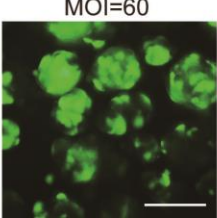

**Supplementary information, fig. S11 Adenoviral expression of Cas9/sgRNAs targeting HBV cccDNA, related to fig. 7.** (a) Schematic diagram of adenoviral vector with HBV-sgRNAs CRISPR/Cas9 expression. (b) 3D-HepLPCs-Hep infected with CAS9/HBV at a MOI of 0, 20, 40, 60 or 80 within 48 hours. GFP, green; Scale bars, 200  $\mu$ m. (c) GFP positive cells in 3D-HepLPCs-Hep infected with CAS9/HBV at a MOI of 60 were still observed at day 15. Scale bar, 200  $\mu$ m.
