# Supplementary material for: Expansion and differentiation of human hepatocyte-derived liver progenitor-like cells and their use for the study of hepatotropic pathogens
Source: PubMed Central journal article supplement (PMC6318298; doi:10.1038/s41422-018-0103-x), 2018-10-25
Supplement: 41422_2018_103_MOESM12_ESM.pdf [file 41422_2018_103_MOESM12_ESM.pdf]

**Supplementary information, Table S1 Donor information.**

| <b>Identifier</b>    | <b>Gender</b> | <b>Age</b> | <b>Associated pathology</b>              |
|----------------------|---------------|------------|------------------------------------------|
| Donor 1              | Female        | 57         | hepatic hemangioma                       |
| Donor 2              | Female        | 45         | hepatic hemangioma                       |
| Donor 3              | Female        | 48         | hepatic hemangioma                       |
| Donor 4              | Male          | 39         | hepatic hemangioma                       |
| Donor 5              | Female        | 51         | hepatic hemangioma                       |
| Donor 6              | Female        | 42         | hepatic hemangioma                       |
| Donor 7              | Female        | 38         | hepatic hemangioma                       |
| Donor 8              | Male          | 49         | hepatic hemangioma                       |
| Donor 9              | Female        | 55         | hepatic hemangioma                       |
| HBV-infected Donor 1 | Female        | 53         | hepatic hemangioma & chronic hepatitis B |
| HBV-infected Donor 2 | Female        | 43         | hepatic hemangioma & chronic hepatitis B |
| HBV-infected Donor 3 | Male          | 59         | hepatic hemangioma & chronic hepatitis B |
