# Supplementary material for: Expansion and differentiation of human hepatocyte-derived liver progenitor-like cells and their use for the study of hepatotropic pathogens
Source: PubMed Central journal article supplement (PMC6318298; doi:10.1038/s41422-018-0103-x), 2018-10-25
Supplement: 41422_2018_103_MOESM13_ESM.pdf [file 41422_2018_103_MOESM13_ESM.pdf]

## Supplementary information, Table S2 Antibody list.

| Primary antibody list                       |                           |               |             |                  |                                  |
|---------------------------------------------|---------------------------|---------------|-------------|------------------|----------------------------------|
| Antibody                                    | Company                   | Product Codes | Ig Species  | Conjugate        | Dilution                         |
| EpCAM                                       | Biologend                 | 324204        | Mouse IgG2b | FITC             | 1:50 (FC)                        |
| Isotype Ctrl                                | Biologend                 | 400310        | Mouse IgG2b | FITC             | 1:50 (FC)                        |
| CD24                                        | Biologend                 | 311108        | Mouse IgG2a | Alexa Fluor® 488 | 1:50 (FC)                        |
| Isotype Ctrl                                | Biologend                 | 400233        | Mouse IgG2a | Alexa Fluor® 488 | 1:50 (FC)                        |
| ASGPR1                                      | Bdbiosciences             | 563655        | Mouse IgG1  | PE               | 1:50 (FC)                        |
| ALB                                         | Bethyl                    | A80-229A      | Goat IgG    | none             | 1:100(IHC)                       |
| ALB                                         | Abcam                     | ab207327      | Rabbit IgG  | none             | 1:20 (FC), 1:100(IF)             |
| CK19                                        | Abcam                     | ab76539       | Rabbit IgG  | none             | 1:20 (FC), 1:100(IF), 1:100(IHC) |
| Isotype Ctrl                                | Cell Signaling Technology | 2975          | Rabbit IgG  | Alexa Fluor® 488 | 1:50 (FC)                        |
| CK18                                        | Abcam                     | ab668         | Mouse IgG1  | none             | 1:50 (FC), 1:100(IF)             |
| Isotype Ctrl                                | Cell Signaling Technology | 4878          | Mouse IgG1  | Alexa Fluor® 488 | 1:50 (FC)                        |
| SOX9                                        | Abcam                     | ab185966      | Rabbit IgG  | none             | 1:50 (FC), 1:100(IF)             |
| HNF1A                                       | Santa Cruz                | sc-393925     | Mouse IgG2a | none             | 1:50 (FC), 1:100(IF)             |
| HNF4A                                       | Abcam                     | ab201460      | Rabbit IgG  | none             | 1:500 (FC), 1:1000(IF)           |
| HBsAg                                       | Abcam                     | ab68520       | Rabbit IgG  | none             | 1:100(IF)                        |
| AFP                                         | Abcam                     | ab46799       | Rabbit IgG  | none             | 1:100(IHC)                       |
| Ki67                                        | Abcam                     | ab15580       | Rabbit IgG  | none             | 1:100(IHC)                       |
| E-cad                                       | Abcam                     | ab1416        | Mouse IgG1  | none             | 1:100(IF)                        |
| CYP3A4                                      | Proteintech               | 18227         | Rabbit IgG  | none             | 1:50(IF)                         |
| NTCP                                        | Aviva Biosystems          | OABF00881     | Rabbit IgG  | none             | 1:50(IF), 1:500(WB)              |
| SIRT1                                       | Proteintech               | 60303         | Mouse IgG2b | none             | 1:100(IF), 1:1000(WB)            |
| Cleaved Caspase-3                           | Cell Signaling Technology | 9661          | Rabbit IgG  | none             | 1:400(IF), 1:1000(WB)            |
| ACTB                                        | Cell Signaling Technology | 3700          | Mouse IgG2b | none             | 1:1000(IF), 1:1000(WB)           |
| GAPDH                                       | Cell Signaling Technology | 97166         | Mouse IgG1  | none             | 1:1000(WB)                       |
| Secondary antibody list                     |                           |               |             |                  |                                  |
| Antibody                                    | Company                   | Product Codes | Dilution    |                  |                                  |
| Goat anti-Mouse IgG (H+L), Alexa Fluor 488  | Invitrogen                | A-11001       | 1:200       |                  |                                  |
| Goat anti-Rabbit IgG (H+L), Alexa Fluor 488 | Invitrogen                | A-11034       | 1:200       |                  |                                  |
| Goat anti-Mouse IgG (H+L), Alexa Fluor 555  | Invitrogen                | A-21422       | 1:200       |                  |                                  |
| Goat anti-Rabbit IgG (H+L), Alexa Fluor 555 | Invitrogen                | A-21428       | 1:200       |                  |                                  |
| Goat anti-Mouse IgG (H+L), HRP              | Invitrogen                | 31430         | 1:5000      |                  |                                  |
| Goat anti-Rabbit IgG (H+L), HRP             | Invitrogen                | 31460         | 1:5000      |                  |                                  |
| Rabbit anti-Goat IgG (H+L), HRP             | Invitrogen                | 61-1620       | 1:5000      |                  |                                  |
