# Supplementary material for: Expansion and differentiation of human hepatocyte-derived liver progenitor-like cells and their use for the study of hepatotropic pathogens
Source: PubMed Central journal article supplement (PMC6318298; doi:10.1038/s41422-018-0103-x), 2018-10-25
Supplement: 41422_2018_103_MOESM14_ESM.pdf [file 41422_2018_103_MOESM14_ESM.pdf]

Supplementary information, Table S3 Primer list.

| Gene      | Forward sequence 5' -> 3' | Reverse sequence 5' -> 3' |
|-----------|---------------------------|---------------------------|
| ALB       | GAGACCAGAGGTTGATGTGATG    | AGTTCCGGGGCATAAAAAGTAAG   |
| G6PC      | GTGTCCGTGATCGCAGACC       | GACGAGGTTGAGCCAGTCTC      |
| HNF4A     | GATGTAGTCCTCCAAGCTCAC     | GCCATCATCTTCTTTGACCCA     |
| CK19      | AACGGCGAGCTAGAGGTGA       | GGATGGTCGTGTAGTAGTGGC     |
| CK7       | TCCGCGAGGTCACCATTAAC      | GCTCTGTCAACTCCGTCTCAT     |
| SOX9      | AGCGAACGCACATCAAGAC       | CTGTAGGCGATCTGTTGGGG      |
| P21       | CGATGGAACCTTCGACTTTGTCA   | GCACAAGGGTACAAGACAGTG     |
| FOXO3     | TCACGCACCAATTCTAACGC      | CACGGCTTGCTTACTGAAGG      |
| NANOG     | TTTGTGGGCCTGAAGAAACT      | AGGGCTGTCCTGAATAAGCAG     |
| CK18      | GTTGACCGTGGAGGTAGATGC     | GAGCCAGCTCGTCATATTGGG     |
| CD24      | CTCCTACCCACGCAGATTTATTC   | AGAGTGAGACCACGAAGAGAC     |
| EpCAM     | AATCGTCAATGCCAGTGTACTT    | TCTCATCGCAGTCAGGATCATAA   |
| AFP       | CTTTGGGCTGCTCGCTATGA      | GCATGTTGATTTAACAAGCTGCT   |
| CYP1A2    | CTGGGCACTTCGACCCTTAC      | TCTCATCGCTACTCTCAGGGA     |
| CYP2B6    | CCGGGGATATGGTGTGATCTT     | CCGAAGTCCCTCATAGTGGTC     |
| CYP3A4    | GTGGGGCTTTTATGATGGTCA     | ACATCTCCATACTGGGCAATGA    |
| cccDNA    | GCCTATTGATTGGAAAGTATGT    | AGCTGAGGCGGTATCTA         |
| 3.5kb RNA | CTCCTCCAGCTTATAGACC       | GTGAGTGGGCCTACAAA         |
| SIRT1     | TAGCCTTGTGAGATAAGGAAGGA   | ACAGCTTCACAGTCAACTTTGT    |
| SIRT2     | TGCGGAACTTATTCTCCAGA      | GAGAGCGAAAGTCGGGGAT       |
| SIRT3     | ACCCAGTGGCATTCCAGAC       | GGCTTGGGGTTGTGAAAGAAG     |
| SIRT4     | GCTTTGCGTTGACTTTGAGGT     | CCAATGGAGGCTTTCCGAGCA     |
| SIRT5     | GCCATAGCCGAGTGTGAGAC      | CAACTCCACAAGAGGTACATCG    |
| SIRT6     | CCCACGGAGTCTGGACCAT       | CTCTGCCAGTTTGTCCCTG       |
| SIRT7     | AGAAGCGTTAGTGCTGCCG       | GAGCCCGTCACAGTTCTGAG      |
| SOX2      | TACAGCATGTCCTACTCGCAG     | GAGGAAGAGGTAACCACAGGG     |
| OCT4      | CTTGAATCCCGAATGGAAAGGG    | GTGTATATCCCAGGGTGATCCTC   |
| MDM2      | GAATCATCGGACTCAGGTACATC   | TCTGTCTACTAATTGCTCTCCT    |
| BAX       | CCCAGAGAGGTCTTTTTCCGAG    | CCAGCCCATGATGGTTCTGAT     |
| PUMA      | GCCAGATTTGTGAGACAAGAGG    | CAGGCACCTAATTGGGCTC       |
| NOXA      | ACCAAGCCGGATTTGCGATT      | ACCAAGCCGGATTTGCGATT      |
| FOXO1     | GGATGTGCATTCTATGGTGTACC   | TTTCGGGATTGCTTATCTCAGAC   |
| FOXO3     | CGGACAAACGGCTCACTCT       | GGACCCGCATGAATCGACTAT     |
| SOD2      | TTTCAATAAGGAACGGGGACAC    | GTGCTCCACACATCAATCC       |
| TPP1      | GTTTCATCACTATGTGGGAGGAC   | GTATCGCTTACGGATCACAGAG    |
| COX-2     | CTGGCGCTCAGCCATACAG       | CGCACTTATACTGGTCAAATCCC   |
| ACTB      | GCCTCGCTGTCCACCTTCC       | TGCTGTCACCTTCACCGTTCC     |
| PXR       | TTGCCCATCGAGGACCAGAT      | GTCTCCGCGTTGAACACTGT      |
| FXR       | TGCAGATCAGACCGTGAATGA     | TTGGTTGCCATTTCCGTCAA      |
| CAR       | GATGCTGGCATGAGGAAAGAC     | TTGCTCCTTACTCAGTTGCAC     |
| CEBPA     | TATAGGCTGGGCTTCCCCTT      | AGCTTTCTGGTGTGACTCGG      |
| OCT1      | GAACATGGGAAGGATAGAGGCA    | GTAGAGTTCGACGCTGGACAT     |
| CYP2C9    | GCCTGAAACCCATAGTGGTG      | GGGGCTGCTCAAAATCTTGATG    |
| CYP2D6    | TGGCAAGGTCCTACGCTTC       | GCCACCACTATGCACAGGTT      |
| CYP2E1    | ATGTCTGCCCTCGGAGTCA       | CGATGATGGGAAGCGGGAAA      |
| MDR1      | GGGAGCTTAACACCCGACTTA     | GCCAAAATCACAAGGGTTAGCTT   |
| BSEP      | TTGGCTGATGTTTGTGGGAAG     | CCAAAATGAGTAGCACGCCT      |
| UGT1A1    | TTGTCTGGCTGTTCCCACTTA     | GGTCCGTCAGCATGACATCA      |
| NNMT      | ATATTCTGCCTAGACGGTGTGA    | TCAGTGACGACGATCTCCTTAAA   |
| MRP3      | ATCCACTCAACGGAGCTGTG      | GCGCGAGTCCTTCAATTTTCA     |
| RXRA      | GGAGGTGAGGGAGGAGTT        | GCATGAGTTAGTCGCAGACAT     |
| NTCP      | TGCTCTTCCCCACATTGATG      | TCCTGGTTCTCATTCTTGC       |
